# Supplementary material for: A comparison of anatomic and cellular transcriptome structures across 40 human brain diseases
Source: PLoS Biol. 2023 Apr 20;21(4):e3002058. doi: 10.1371/journal.pbio.3002058 (PMC10118126; doi:10.1371/journal.pbio.3002058)
Supplement: S1 Table — First sheet table provides a general description of the disease with its traditional classification information and a link to each disorder’s Medical Subject Heading (MeSH) webpage. Second sheet includes all the genes associated with each disease included in the current study. (XLSX) [file pbio.3002058.s002.xlsx]

## Sheet: Brain_disease_attributes
diseaseId	name	type	diseaseClassMSH	diseaseClassNameMSH	hpoClassId	hpoClassName	doClassId	doClassName	umlsSemanticTypeId	umlsSemanticTypeName	MeSH site
C0001969	Alcoholic Intoxication	disease	C25;F03	Chemically-Induced Disorders; Mental Disorders					T048	Mental or Behavioral Dysfunction	https://www.ncbi.nlm.nih.gov/mesh/68000435
C0002395	Alzheimer Disease	disease	C10;F03	Nervous System Diseases; Mental Disorders	HP:0000707	Abnormality of the nervous system	DOID:630;DOID:7	genetic disease; disease of anatomical entity	T047	Disease or Syndrome	https://www.ncbi.nlm.nih.gov/mesh/68000544
C0002622	Amnesia	disease	C23;C10;F03;F01	Pathological Conditions, Signs and Symptoms; Nervous System Diseases; Mental Disorders; Behavior and Behavior Mechanisms			DOID:150	disease of mental health	T048	Mental or Behavioral Dysfunction	https://www.ncbi.nlm.nih.gov/mesh/68000647
C0236733	Amphetamine-Related Disorders	group	C25;F03	Chemically-Induced Disorders; Mental Disorders			DOID:150	disease of mental health	T048	Mental or Behavioral Dysfunction	https://www.ncbi.nlm.nih.gov/mesh/68019969
C0002736	Amyotrophic Lateral Sclerosis	disease	C18;C10	Nutritional and Metabolic Diseases; Nervous System Diseases	HP:0000707	Abnormality of the nervous system	DOID:630;DOID:7	genetic disease; disease of anatomical entity	T047	Disease or Syndrome	https://www.ncbi.nlm.nih.gov/mesh/68000690
C0004114	Astrocytoma	disease	C04	Neoplasms	HP:0000707;HP:0002664	Abnormality of the nervous system; Neoplasm	DOID:7;DOID:14566	disease of anatomical entity; disease of cellular proliferation	T191	Neoplastic Process	https://www.ncbi.nlm.nih.gov/mesh/68001254
C0004134	Ataxia	phenotype	C23;C10	Pathological Conditions, Signs and Symptoms; Nervous System Diseases	HP:0000707	Abnormality of the nervous system			T184	Sign or Symptom	https://www.ncbi.nlm.nih.gov/mesh/68001259
C0004352	Autistic Disorder	disease	F03	Mental Disorders	HP:0000707	Abnormality of the nervous system	DOID:150	disease of mental health	T048	Mental or Behavioral Dysfunction	https://www.ncbi.nlm.nih.gov/mesh/68001321
C0005586	Bipolar Disorder	disease	F03	Mental Disorders	HP:0000707	Abnormality of the nervous system	DOID:150	disease of mental health	T048	Mental or Behavioral Dysfunction	https://www.ncbi.nlm.nih.gov/mesh/68001714
C0236736	Cocaine-Related Disorders	group	C25;F03	Chemically-Induced Disorders; Mental Disorders			DOID:150	disease of mental health	T048	Mental or Behavioral Dysfunction	https://www.ncbi.nlm.nih.gov/mesh/68019970
C0497327	Dementia	disease	C10;F03	Nervous System Diseases; Mental Disorders	HP:0000707	Abnormality of the nervous system	DOID:150	disease of mental health	T048	Mental or Behavioral Dysfunction	https://www.ncbi.nlm.nih.gov/mesh/68003704
C0011581	Depressive Disorder	disease	F03	Mental Disorders	HP:0000707	Abnormality of the nervous system	DOID:150	disease of mental health	T048	Mental or Behavioral Dysfunction	https://www.ncbi.nlm.nih.gov/mesh/68003866
C0013421	Dystonia	phenotype	C23;C10	Pathological Conditions, Signs and Symptoms; Nervous System Diseases	HP:0000707	Abnormality of the nervous system	DOID:7	disease of anatomical entity	T184	Sign or Symptom	https://www.ncbi.nlm.nih.gov/mesh/68004421
C0014544	Epilepsy	disease	C10	Nervous System Diseases	HP:0000707	Abnormality of the nervous system	DOID:7	disease of anatomical entity	T047	Disease or Syndrome	https://www.ncbi.nlm.nih.gov/mesh/68004827
C0014556	Epilepsy, Temporal Lobe	disease	C10	Nervous System Diseases			DOID:7	disease of anatomical entity	T047	Disease or Syndrome	https://www.ncbi.nlm.nih.gov/mesh/68004833
C0751072	Frontotemporal Lobar Degeneration	disease	C18;C10;F03	Nutritional and Metabolic Diseases; Nervous System Diseases; Mental Disorders					T048	Mental or Behavioral Dysfunction	https://www.ncbi.nlm.nih.gov/mesh/68057174
C0017636	Glioblastoma	disease	C04	Neoplasms			DOID:7;DOID:14566	disease of anatomical entity; disease of cellular proliferation	T191	Neoplastic Process	https://www.ncbi.nlm.nih.gov/mesh/68005909
C0017638	Glioma	disease	C04	Neoplasms	HP:0000707;HP:0002664	Abnormality of the nervous system; Neoplasm	DOID:7;DOID:14566	disease of anatomical entity; disease of cellular proliferation	T191	Neoplastic Process	https://www.ncbi.nlm.nih.gov/mesh/68005910
C0206726	Gliosarcoma	disease	C04	Neoplasms			DOID:7;DOID:14566	disease of anatomical entity; disease of cellular proliferation	T191	Neoplastic Process	https://www.ncbi.nlm.nih.gov/mesh/68018316
C0019337	Heroin Dependence	disease	C25;F03	Chemically-Induced Disorders; Mental Disorders			DOID:150	disease of mental health	T048	Mental or Behavioral Dysfunction	https://www.ncbi.nlm.nih.gov/mesh/68006556
C0020179	Huntington Disease	disease	C16;C10;F03	Congenital, Hereditary, and Neonatal Diseases and Abnormalities; Nervous System Diseases; Mental Disorders			DOID:7	disease of anatomical entity	T047	Disease or Syndrome	https://www.ncbi.nlm.nih.gov/mesh/68006816
C0020429	Hyperalgesia	phenotype	C23;C10	Pathological Conditions, Signs and Symptoms; Nervous System Diseases	HP:0000707	Abnormality of the nervous system			T184	Sign or Symptom	https://www.ncbi.nlm.nih.gov/mesh/68006930
C0023014	Language Development Disorders	group	C23;C10	Pathological Conditions, Signs and Symptoms; Nervous System Diseases			DOID:150	disease of mental health	T048	Mental or Behavioral Dysfunction	https://www.ncbi.nlm.nih.gov/mesh/68007805
C0023186	Learning Disorders	group	C23;C10;F03	Pathological Conditions, Signs and Symptoms; Nervous System Diseases; Mental Disorders			DOID:150	disease of mental health	T048	Mental or Behavioral Dysfunction	https://www.ncbi.nlm.nih.gov/mesh/68007859
C0024809	Marijuana Abuse	disease	C25;F03	Chemically-Induced Disorders; Mental Disorders			DOID:150	disease of mental health	T048	Mental or Behavioral Dysfunction	https://www.ncbi.nlm.nih.gov/mesh/68007859
C1136249	Intellectual disability, X-linked (Mental Retardation, X-Linked)	disease	C16;C10	Congenital, Hereditary, and Neonatal Diseases and Abnormalities; Nervous System Diseases					T047	Disease or Syndrome	https://www.ncbi.nlm.nih.gov/mesh/68038901
C0149931	Migraine Disorders	group	C10	Nervous System Diseases	HP:0000707	Abnormality of the nervous system	DOID:7	disease of anatomical entity	T047	Disease or Syndrome	https://www.ncbi.nlm.nih.gov/mesh/68008881
C0026769	Multiple Sclerosis	disease	C20;C10	Immune System Diseases; Nervous System Diseases			DOID:7	disease of anatomical entity	T047	Disease or Syndrome	https://www.ncbi.nlm.nih.gov/mesh/68009103
C0027404	Narcolepsy	disease	C10;F03	Nervous System Diseases; Mental Disorders	HP:0000707	Abnormality of the nervous system	DOID:150	disease of mental health	T047	Disease or Syndrome	https://www.ncbi.nlm.nih.gov/mesh/68009290
C0027796	Neuralgia	phenotype	C23;C10	Pathological Conditions, Signs and Symptoms; Nervous System Diseases					T184	Sign or Symptom	https://www.ncbi.nlm.nih.gov/mesh/68009437
C0027831	Neurofibromatosis 1	disease	C16;C04;C10	Congenital, Hereditary, and Neonatal Diseases and Abnormalities; Neoplasms; Nervous System Diseases			DOID:630	genetic disease	T191	Neoplastic Process	https://www.ncbi.nlm.nih.gov/mesh/68009456
C0028768	Obsessive Compulsive Disorder	disease	F03	Mental Disorders	HP:0000707	Abnormality of the nervous system	DOID:150	disease of mental health	T048	Mental or Behavioral Dysfunction	https://www.ncbi.nlm.nih.gov/mesh/68009771
C0030567	Parkinson Disease	disease	C10	Nervous System Diseases			DOID:630;DOID:7	genetic disease; disease of anatomical entity	T047	Disease or Syndrome	https://www.ncbi.nlm.nih.gov/mesh/68010300
C0242422	Parkinsonian Disorders	group	C10	Nervous System Diseases	HP:0000707	Abnormality of the nervous system	DOID:7	disease of anatomical entity	T047	Disease or Syndrome	https://www.ncbi.nlm.nih.gov/mesh/68020734
C0036341	Schizophrenia	disease	F03	Mental Disorders	HP:0000707	Abnormality of the nervous system	DOID:150	disease of mental health	T048	Mental or Behavioral Dysfunction	https://www.ncbi.nlm.nih.gov/mesh/68012559
C0085159	Seasonal Affective Disorder	disease	F03	Mental Disorders			DOID:150	disease of mental health	T048	Mental or Behavioral Dysfunction	https://www.ncbi.nlm.nih.gov/mesh/68016574
C0037773	Spastic Paraplegia, Hereditary	disease	C16;C10	Congenital, Hereditary, and Neonatal Diseases and Abnormalities; Nervous System Diseases			DOID:630;DOID:7	genetic disease; disease of anatomical entity	T047	Disease or Syndrome	https://www.ncbi.nlm.nih.gov/mesh/68015419
C0038587	Substance Withdrawal Syndrome	disease	C25;F03	Chemically-Induced Disorders; Mental Disorders					T048	Mental or Behavioral Dysfunction	https://www.ncbi.nlm.nih.gov/mesh/68013375
C0040332	Tobacco Use Disorder	disease	C25;F03	Chemically-Induced Disorders; Mental Disorders					T048	Mental or Behavioral Dysfunction	https://www.ncbi.nlm.nih.gov/mesh/68014029
C0175702	Williams Syndrome	disease	C16;C10;C14	Congenital, Hereditary, and Neonatal Diseases and Abnormalities; Nervous System Diseases; Cardiovascular Diseases			DOID:630	genetic disease	T047	Disease or Syndrome	https://www.ncbi.nlm.nih.gov/mesh/68018980
C0011206	Delirium	disease	C23;C10;F03;F01	Pathological Conditions, Signs and Symptoms; Nervous System Diseases; Mental Disorders; Behavior and Behavior Mechanisms	HP:0000707	Abnormality of the nervous system	DOID:150	disease of mental health	T048	Mental or Behavioral Dysfunction	https://www.ncbi.nlm.nih.gov/mesh/68003693
C0221074	Depression, Postpartum	disease	C13;F03	Female Urogenital Diseases and Pregnancy Complications; Mental Disorders			DOID:150	disease of mental health	T048	Mental or Behavioral Dysfunction	https://www.ncbi.nlm.nih.gov/mesh/68019052
C0026552	Morphine Dependence	disease	C25;F03	Chemically-Induced Disorders; Mental Disorders			DOID:150	disease of mental health	T048	Mental or Behavioral Dysfunction	https://www.ncbi.nlm.nih.gov/mesh/68009021
C0026613	Motor Skills Disorders	group	F03	Mental Disorders			DOID:150	disease of mental health	T048	Mental or Behavioral Dysfunction	https://www.ncbi.nlm.nih.gov/mesh/68019957
C0028945	Oligodendroglioma	disease	C04	Neoplasms			DOID:14566	disease of cellular proliferation	T191	Neoplastic Process	https://www.ncbi.nlm.nih.gov/mesh/68009837
C0027412	Opioid-Related Disorders	group	C25;F03	Chemically-Induced Disorders; Mental Disorders			DOID:150	disease of mental health	T048	Mental or Behavioral Dysfunction	https://www.ncbi.nlm.nih.gov/mesh/68009293
C0030319	Panic Disorder	disease	F03	Mental Disorders			DOID:150	disease of mental health	T048	Mental or Behavioral Dysfunction	https://www.ncbi.nlm.nih.gov/mesh/68016584
C0851578	Sleep Disorders	group	C23;C10;F03	Pathological Conditions, Signs and Symptoms; Nervous System Diseases; Mental Disorders					T048	Mental or Behavioral Dysfunction	https://www.ncbi.nlm.nih.gov/mesh/68012893
C0040822	Tremor	phenotype	C23;C10	Pathological Conditions, Signs and Symptoms; Nervous System Diseases	HP:0000707	Abnormality of the nervous system			T184	Sign or Symptom	https://www.ncbi.nlm.nih.gov/mesh/68014202

## Sheet: Associated genes
Alcoholic Intoxication	Alzheimer Disease	Amnesia	Amphetamine-Related Disorders	Amyotrophic Lateral Sclerosis	Astrocytoma	Ataxia	Autistic Disorder	Bipolar Disorder	Cocaine-Related Disorders	Dementia	Depressive Disorder	Dystonia	Epilepsy	Epilepsy, Temporal Lobe	Frontotemporal Lobar Degeneration	Glioblastoma	Glioma	Gliosarcoma	Heroin Dependence	Huntington Disease	Hyperalgesia	Intellectual disability, X-linked	Language Development Disorders	Learning Disorders	Marijuana Abuse	Migraine Disorders	Multiple Sclerosis	Narcolepsy	Neuralgia	Neurofibromatosis 1	Obsessive compulsive disorder	Parkinson Disease	Parkinsonian Disorders	Schizophrenia	Seasonal Affective Disorder	Spastic Paraplegia, Hereditary	Substance Withdrawal Syndrome	Tobacco Use Disorder	Williams Syndrome	Opioid-related disorders	Delirium	Depression, postpartum	Morphine dependence	Motor skills disorders	Oligodendroglioma	Panic disorder	Sleep disorders	Tremor
ADH1C	A2M	APP	ACHE	ANG	ACVR1	ABCB7	ABAT	ACADS	APOL2	ABCA7	A2M	ACTB	ABCB1	APOE	C9ORF72	APC	ACVR1	CYP2B6	BDNF	AIFM1	ADM	ARHGEF9	BCL11A	ACHE	ABCB1	ARMS2	APOE	CHKB	AGER	BRAF	BDNF	ABCB1	ALDH1A1	A1BG	ARNTL	ADAR	ADCY1	AHR	BAZ1B	BMPER	APOE	HP1BP3	CREB1	AKAP5	DTX1	ADORA2A	BHLHE41	ACHE
AKR1A1	ABCA7	AVP	ACSL6	ANXA11	BRAF	ARCN1	ACADSB	ACTB	ARC	APOE	AANAT	ANO3	ADRA2A	BDKRB1	CHMP2B	BCHE	ALK	CYP2C18	CEBPB	CNR1	AGER	ATRX	CNTNAP2	APOD	AKT1	ASTN2	BCHE	CPT1B	ANTXR2	ERCC4	CCKBR	AIF1	ALDH1A2	ABCA1	CLOCK	AFG3L2	ADCY8	BDNF	BCL7B	CES1	DRD2	HTR1A	GRIA1	CLN6	GDNF	ADRA2A	CHRNA4	ADORA2A
ALDH1A1	ABI3	GNAI1	ADORA2A	ATXN2	DLL3	ATP7A	ADA	ADARB1	ATP9B	APP	ABCB1	ATP1A3	AKT1	BDKRB2	FUS	BHLHE40	APC	EGFR	CEBPG	DIABLO	AGT	CASK	DPYD	APP	APOL2	ATP1A2	CASP1	CTSH	CACNA2D1	FANCA	GABBR1	ANO3	ATP13A2	ABCB1	CRY1	ALDH18A1	ADORA1	CHRNA3	CLDN3	NAV3	DRD3	MTHFR	GRIN2A	DISC1	HES1	CCKBR	CHRNB2	ADRB2
ALDH2	ACHE	GNAI3	AK5	C21ORF2	ERBB2	CACNA1A	ADM	ADCY2	BCHE	BIN1	ACSL4	CACNA1B	ALB	CALHM1	GRN	BMI1	APOD	FGFR1	DRD2	FAAH	AIF1	CXORF36	ERF	BCL2	CALM1	CACNA1A	CBLB	HCRT	CALCA	FANCB	HTR1D	ATP13A2	ATP1A3	ACHE	CRY2	ALS2	ADORA2A	CHRNA5	CLDN4	PENK	IGF1	OPRM1	MMP9	FGFR2	HEY1	COMT	HTR7	ATP7A
AUTS2	AMFR	GRP	AKT1	C9ORF72	FGFR1	CACNA1G	ADRB2	ADCY3	BDNF	CD2AP	ADCY5	CHRNA4	AUTS2	CNR1	ITM2B	BRD2	ATM	FGFR3	ENO2	GDNF	ALOX5	DLG3	FOXP2	GRIA1	CALM2	CALCA	CD40	HCRTR2	CRLF1	FANCC	HTR2A	ATP1A3	DCTN1	ACP1	DRD4	AMPD2	ARL6IP5	CHRNA7	CLIP2	TTC9	LIF	PER2	NOS1	OGG1	IDH1	INS	IL1B	CHRM4
BCHE	APBB2	HRH3	AOAH	CAMK1G	H3F3A	CACNA2D2	ADSL	ADCY8	CALM1	CLU	ADCY7	CIZ1	BDNF	GABBR1	MAPT	BRD4	ATP1B2	IDH1	GABRA2	HTT	AVP	FGD1	GRIN2A	HMOX1	CAMK2B	CDCA2	CD58	HLA-DRB1	CXCR4	FANCE	KCNH5	ATP6AP2	DDC	ACSL6	FKBP5	AP4B1	AVP	CYP2D6	DLG4		SLC6A3		OPRL1	PTEN	IDH2		POMC	CYP2D6
BDNF	APOE	NGF	ARRB2	CCNF	HEY1	CACNB4	AGAP1	ADCYAP1	CALM2	CP	ADCY8	CYP2D6	CHD2	GABBR2	SIGMAR1	CD9	ATR	LZTR1	HAT1	IP6K2	BDKRB1	GDI1	KCNA2	HTR1A	CHRM5	DOCK4	CD6	MOG	CYP17A1	FANCF	KCNK10	ATXN2	DRD2	ACSM1	HTR2A	AP4E1	BDNF	DRD2	ELN		TH		OPRM1	SHANK1	POT1		SLC6A3	HTR1A
CD19	APP	PDYN	ASTN2	CHCHD10	HEY2	CCDC88C	AHI1	ADM	CAMK2A	DNMT1	ADCYAP1	GCH1	CHRM1	GRM1	TARDBP	CDK6	ATRX	MGMT	JUN	MAOA	BDKRB2	IQSEC2	NRXN1	HTR7	CNR1	EDNRA	CLDN11	P2RY11	GAL	FANCG	MOG	ATXN3	GBA	ACTB	HTR2C	AP4M1	CCKBR	HTR2A	FKBP6									SCN8A
CHAT	ARC	POMC	BDNF	CHMP2B	HGF	CP	APC	ADRA1A	CAMK2B	EPHA1	ADORA2A	GNAL	CHRM2	GRM2	TBK1	CHI3L1	BMI1	NFKBIA	NGF	MAOB	CACNA1H	MAOA	PTEN	IL1B	CNR2	FGF6	CLEC16A	PENK	GFRA1	FANCI	NRXN3	BAG5	GDNF	ACTR2	MTHFR	AP4S1	CHRM5	LCP1	FZD9									TRH
CHRM2	BACE1	PREP	CCHCR1	DAO	HIF1A	EGR3	AQP4	ADRA2C	CAMK4	GRN	ADRA2A	PRKRA	CNTNAP2	GRM3	TBP	CSTB	BRAF	POR	OPRM1	OGG1	CACNA2D1	OPHN1	SETBP1	KL	COMT	FHL5	CNR1	SOCS2	GRM5	FANCL	OLIG2	BDNF	GSR	ADAM12	NPAS2	ARL6IP1	CHRNA5	LYSMD3	GTF2I
COX8A	BAX	SIGMAR1	CD55	DBR1	HIST1H3A	FAT2	ASTN2	ADRB2	CARTPT	MAPT	ADRB1	PRRT2	FLNA	GRM4	TMEM106B	CTNND2	CAT	PPARG	PDK1	RCAN1	CALCA	PCDH19	SHANK3	MAPT	DRD2	GJA1	HLA-DPB1	TAC1	HMGB1	FANCM	SLC1A1	BST1	HTRA2	ADAMTS3	NPY	ARSI	CHRNA6	OPRM1	GTF2IRD1
DRD4	BCHE	TAC1	CDH13	DCTN1	IDH2	GABRA1	ATP10A	AGT	CCKBR	PICALM	AGT	SCP2	FOLR1	GRM5		CTSB	CDKN2A	TACC1	POMC	SLC29A1	CAMK2A	PQBP1		MECP2	DRD4	GPR149	HLA-DRA	TNFSF4	HTR2C	GNAS	SLITRK5	C19ORF12	LRRK2	ADAMTSL3	NR1D1	ATL1	CHRNA7	PLEKHG1	LIMK1
EIF4A2	BCL2	TRH	COL28A1	DPP6	KIAA1549	GABRA4	AVP	AKAP10	CES1	SLC6A3	AKT1	SERAC1	FOS	KCNC4		CTSK	CDKN2B	TACC3	PRKCB	SLC2A3	CARTPT	PTCHD1		NF1	EGFR	HEY2	HLA-DRB1	TRH	MBD1	KITLG		C9ORF72	MAPT	ADARB1	OPN4	B4GALNT1	CHRNB2	RPTOR	MLXIPL
FYN	BDNF		COMT	EPHA4	KRAS	GRM1	AVPR1A	AKT1	CES2	SLC9A8	ALB	SLC2A1	FOSB	KDR		DAXX	CDKN2C	VEGFA	RETN		CCKBR	RAB39B		PDE1B	FAAH	HPSE2	ICAM1	ZNF365	NTRK1	MAP2K1		CHCHD2	NGF	ADCY7	PDE4A	BSCL2	CNR1		POM121
GABRA1	BIN1		CSMD1	ERBB4	LATS1	HCN1	BCL2	AKT2	CHRM5	TREM2	ALG8	SLC30A10	GABRB3	NPY		DUSP6	CHI3L1				CCL2	RAB40AL		PNOC	FDFT1	HTR2A	IL17A		OPRM1	MLH1		CP	PARK7	ADCYAP1	PER3	C12ORF65	CREB1		RFC2
GABRA2	BLMH		CUBN	FIG4	LATS2	MME	BDNF	ALDH2	CNR1		ALK	TAF1	GFAP	NPY2R		EGF	CIC				CNR1	SLC6A8		POR	GAL	ITPK1	IL1B		SCN9A	MSH2		CSF1R	PARP1	ADCYAP1R1	RORA	C19ORF12	CRH		TBL2
GRIK1	CALM1		CYP2D6	FUS	MET	NPC1	BTD	ANK3	COL21A1		ANKK1	TH	GPX1	P2RX4		EGFR	CLCN2				CNR2	SYP		PSEN1	GCC1	JAG1	IL7R		TAC1	MSH6		CYP2D6	PDYN	ADK	TPH2	CCT5	DRD2		WBSCR22
HSPA4	CASP3		DRD1	GFAP	MMP9	PLD3	C3ORF58	ANKK1	COMT		APP	THAP1	GRIN2A	P2RX7		FAT1	CLCN3				COMT	UPF3B		RNF135	HCRT	LRP1	IRF8		TNF	NF1		CYP2E1	PINK1	ADM		CYP2U1	FAAH		WBSCR27
IL18	CD2AP		DRD2	GLE1	NCOA3	PUM1	C4B	APOD	CREB1		APRT	TOR1A	GRIN2B	PDYN		FN1	CLCN5				CRHR1	ZNF41		SIGMAR1	IL1B	MEF2D	KCNJ10		TRPV1	PMS2		DCTN1	POLG	ADNP2		CYP7B1	FOS
KCNJ6	CD33		DRD3	GSR	NDRG1	SCN8A	CACNA1C	APOE	CRH		AQP4		GRM1	PRNP		GDNF	DMBT1				CSK	ZNF674		SLC17A6	MAPK14	MPPED2	KIF1B			POLA1		DDC	PRKCD	ADORA1		DDHD1	GNAI1
MPO	CHRNA7		DRD4	GSTP1	NF1	SLC2A1	CACNA1H	APP	CRHBP		ARNTL		HCN1	SCN1A		GSTT1	DMXL1				DRD3	ZNF711		SLC17A7	NCAM1	NOTCH4	MCAM			PTPN11		DDIT4	PRKRA	ADORA2A		DDHD2	GNAO1
MTHFR	CHRNB2		EPHX1	HNRNPA1	NOTCH1	TRPC3	CADM1	ARNTL	CRHR1		ARRB2		ILK	SCN1B		H2AFX	EGFR				EDN1			SYP	NRG1	NRP1	NLRP3			RAF1		DNAJC6	PRL	ADRA1A		DSTYK	GNAS
MTR	CLU		FHIT	MATR3	NOTCH2		CADPS2	ARNTL2	CRHR2		ARTN		KCNAB2	SLC12A2		H3F3A	ERBB2				FOS			TH	PDYN	PHACTR1	P2RX7			SPRED1		DRD1	SLC18A2	ADRA2A		ENTPD1	GRIA1
NR3C1	CRH		FKBP15	MOBP	NTRK2		CALCA	ARRB2	DRD1		ATF3		KCNH1	SLC12A5		HES1	FAM107A				GAL			TRH	PENK	PLCE1	POMC			UBE2T		DRD2	SLC30A10	ADSS		ERLIN2	GRIA2
OPRM1	CST3		FOS	NEFH	PTPN11		CAT	ASTN2	DRD2		ATF4		KCNQ2	SLC1A1		HEY1	FBXW7				GDNF			VEGFA	PTGS2	PRDM16	RBPJ					EDN1	SNCA	AGA		FA2H	GRIN2A
PECR	CYP2D6		GABRG2	NEK1			CDH10	ATF4	DRD3		ATP1A3		L2HGDH	SLIT2		HIF1A	FGF2				GFAP				RGS17	PRRT2	SELE					EIF4G1	TH	AGER		GAD1	HCRT
PER2	CYP46A1		GDNF	OPTN			CDH9	ATF5	EGR1		ATP2A2		MEF2C	TEK		HIST1H3B	FGFR1				GRIN1				SCARB1	SCN1A	SLC11A1					EPHB4		AHI1		GBA2	HCRTR1
RELA	DHCR24		GRM2	PFN1			CHD8	ATP1A1	EHMT2		ATXN3		NPY	TRPV1		IL1B	FTH1				GRIN2B					SPINK2	STAT4					FBP1		AKR1A1		GJC2	HRH1
SOD2	DPYSL2		GSTM1	PLA2G4A			CHRNA4	ATP1A2	FDFT1		BAG1		NPY2R	VDR		JAG1	FUBP1				HMGB1					TGFBR2	TNFAIP3					FBXO7		AKT1		KIDINS220	HRH2
ST6GAL1	EIF2S1		GSTP1	PON2			CHRNA7	ATP1A3	FGF2		BCL2		OPRD1	VEGFA		JAG2	GDNF				HOXD1					TNF	TNFRSF1A					FTL		ALDH1A1		KIF1A	HTR2C
	ENO1		GSTT1	PON3			CHRNB2	AVP	FOS		BDNF		OPRM1			LTBP4	GSTP1				HTR2A					TSPAN2	TNFSF14					GAK		ALDH1A2		KIF5A	MAPK1
	EPHA1		HS3ST4	PPARGC1A			CNTN3	BAG1	FOSB		BICC1		P2RX2			LZTR1	H3F3A				IGF1					WSCD1	TYK2					GBA		ALDH3B1		L1CAM	MAPK3
	F2		HTR1B	PRPH			CNTN4	BCHE	GABBR1		BRCA1		P2RX4			MDM4	H3F3B				IL1B					YAP1	VCAM1					GCH1		ALK		MARS	MMP9
	GAPDHS		HTR3A	PTGS2			CNTNAP2	BCL2	GABRA2		CACNA1C		PCDH19			MET	HIST1H3A				INSR					ZCCHC14	VDR					GDNF		ALS2CL		MARS2	NOS2
	GSK3B		HTR6	SCFD1			COMT	BCL9	GABRG2		CADM1		POLG			MGMT	HIST1H3B				ITGA2											GFAP		AMACR		MFN2	NPTX2
	HLA-DRB5		LINGO2	SIGMAR1			CP	BCR	GAD1		CALM2		POMC			MMP9	HIST1H3C				MAPK1											GNAL		AMBRA1		MTPAP	NPY
	HMOX1		MAP2K5	SLC1A2			CSMD3	BDKRB2	GAD2		CAMK2A		RAB39B			MYC	HIST1H3D				MAPK3											GPX1		ANK3		NIPA1	NPY2R
	IDE		MYO5B	SLC6A1			CUL7	BDNF	GCC1		CARTPT		SCN1A			NCOR1	HIST1H3E				MAPK7											GRN		ANKK1		NKX6-2	OPRD1
	IGF1		NOS1	SOD1			CYP19A1	BHLHE40	GDNF		CDH13		SCN2A			NDRG1	HIST1H3F				MAPK8											GSTA4		APBA2		NT5C2	OPRK1
	IGF1R		NPY1R	SOD2			DAB1	BHLHE41	GHRL		CDKN2A		SCN8A			NF1	HIST1H3G				MAPK9											GSTM1		APC		OPA3	OPRL1
	IGF2		NRG1	SQSTM1			DAO	BID	GPHN		CHAT		SLC12A2			NOTCH1	HIST1H3H				MC1R											GSTP1		APOA4		PCDH12	PER1
	IGF2R		OPRM1	TAF15			DHCR7	BRD1	GPSM1		CHRM2		SLC12A5			NOTCH2	HIST1H3I				MPZ											HGF		APOD		PGAP1	PER2
	IL1B		PCOLCE2	TARDBP			DHFR	C14ORF28	GRIA1		CHRNA2		SLC1A1			NOTCH3	HIST1H3J				NGF											HLA-DRA		APOE		PLP1	PER3
	INS		PDE4B	TBK1			DISC1	CACNA1A	GRIA2		CHRNA4		SLC1A2			PDGFRA	HLA-A				NOS1											HLA-DRB5		APOL2		PNPLA6	PNOC
	INSR		PDE4D	TNFRSF21			DIXDC1	CACNA1B	GRIN1		CHRNA6		SLC1A3			PIM1	HLA-B				NOS2											HMOX1		APOL4		POLR3A	POMC
	MAOB		PDE6C	TREM2			DLGAP2	CACNA1C	GRM5		CHRNB3		SLC4A10			PML	HLA-C				NTF3											HSPA1A		AQP4		PQBP1	PRL
	MAPT		PDYN	UBQLN2			DLX1	CACNA1D	HCRT		CLOCK		SPARCL1			POLK	IDH1				OPRM1											HSPA9		ARC		PSEN1	SLC6A1
	MPO		PICK1	UNC13A			DLX2	CACNB2	HCRTR1		CMKLR1		STAMBP			PTEN	KLF6				P2RX2											HTRA2		ARHGAP1		REEP1
	MS4A4A		PLAT	VAPB			DOCK4	CALM2	HDAC4		CNR1		STX1B			PTK2	MDK				P2RX3											HTT		ARHGAP18		REEP2
	MTHFR		POU5F1	VCP			DPYD	CALR	HDAC5		CNR2		SYNGAP1			RECK	MDM2				PDYN											IGF1R		ARHGEF11		RTN2
	NCSTN		PRDM2				DRD1	CAMK2A	HOMER1		COMT		TGFB1			RUNX1	MGMT				PNOC											IGF2		ARVCF		SACS
	NOS3		PRKG1				DRD3	CBS	HOMER2		CPLX1		TSC1			SUZ12	MSH2				PRKCE											IGF2R		ASAH1		SERAC1
	NPY		PSD3				EGF	CDH7	HTR1A		CPLX2		TSC2			TES	MYB				PRKCG											INS		ASTN2		SLC16A2
	PAXIP1		RALY				EIF4E	CHMP1B	HTR1B		CREB1		TXNRD1			TGM2	MYBL1				PRKCZ											INSR		ATF4		SLC25A46
	PCDH11X		RAPGEF5				EN2	CHRM2	HTR2A		CRH		UBE3A			TNFSF10	MYLK				PROK2											IPPK		ATM		SLC33A1
	PICALM		RELA				FARP2	CHRNA2	ILK		CRHBP		VDAC1			VEGFA	NBN				PROKR1											JPH3		ATP2A2		SPAST
	PLCG2		RGS17				FBXO40	CHRNA6	JUND		CRHR1		VDAC2			ZBTB7A	NF1				PTGER1											KCNJ4		ATXN2		SPG11
	PPARG		SERPINA5				FMR1	CHRNA7	KLHL5		CRHR2						NTRK1				PTGS1											LRRK2		AUTS2		SPG21
	PRNP		SGCZ				FOXP2	CHRNB3	LRRC7		CRY1						NTRK2				PTGS2											LYST		AVP		SPG7
	PSEN1		SH3RF3				FRMPD4	CLOCK	MANEA		CRY2						NTRK3				RAF1											MAG		AVPR1A		TFG
	PSEN2		SLC6A3				GABBR1	CNR1	MAPK1		CSMD2						PHLDB1				SLC12A5											MAOA		B3GAT1		USP8
	PYY		SLC6A9				GABBR2	CNR2	MAPK3		CYP2D6						PIK3CA				SPARC											MAOB		B3GAT2		VAMP1
	RELN		SMYD3				GABRA1	CNTN4	MECP2		DEAF1						PIK3R1				SYN2											MAP3K5		B3GNT2		VPS37A
	SLC2A4		SNCA				GABRA2	CNTN6	NGF		DGKB						PLK1				TAC1											MAPT		BACE1		WDR48
	SLC30A4		TRPM3				GABRA3	CNTNAP2	NPY		DISC1						PMS2				THBD											MTA1		BAG1		ZEB2
	SLC30A6		USP48				GABRA4	COMT	NPY2R		DIXDC1						POT1				TNF											NGF		BCL11A		ZFYVE26
	SOD2		ZNF385D				GABRA5	CPLX1	NR3C1		DKK4						PPM1D				TNFRSF11B											NOS1		BCL2		ZFYVE27
	SORL1		ZNF423				GABRB1	CPLX2	NTRK2		DLG4						PSD3				TRPV1											NQO1		BCL9
	TF						GABRB3	CREB1	OPRK1		DPP4						PTEN				VIP											NR4A2		BDNF
	TFAM						GAD1	CRH	OPRM1		DPYSL2						PTGS2															OPA3		BECN1
	TNF						GHR	CRHR1	PDYN		DRD1						QKI															PANK2		BHLHE40
	TPP1						GJA1	CRHR2	POMC		DRD2						RAF1															PARK7		BID
	TREM2						GLO1	CRY1	PRL		DRD3						ROS1															PINK1		BLOC1S1
	VEGFA						GPR155	CRY2	PRMT6		DRD4						RTEL1															PLA2G6		BLOC1S3
	VSNL1						GPX1	CSMD1	RPS6KA5		DRD5						SLC5A5															PRKRA		BRAP
							GRIA1	CSNK1E	SCARB1		DTNBP1						SOD1															RAB39B		BRCA1
							GRIK2	CSRP1	SIGMAR1		DUSP1						SPP1															RPL14		BRD1
							GRIN2A	CUX2	SLC1A2		DUSP4						STAG2															RPL23A		BTBD9
							GRM8	DAO	SLC6A3		DUSP6						STMN1															RPL6		BTC
							GSTM1	DAZAP1	SMAD3		EGR3						SUZ12															RPS8		BTG1
							GSTP1	DBN1	SMARCA4		FEV						TERT															SGCE		C1QB
							GZMB	DBNL	SNCA		FGF17						TFRC															SLC18A2		C9ORF72
							HDLBP	DCLK1	SYT13		FGF2						TNF															SLC30A10		CACNA1B
							HLA-A	DCTN5	TACR3		FGF20						TNFSF10															SLC39A14		CACNA1C
							HLA-DRB1	DDC	TYK2		FGFR1						XAF1															SLC41A1		CACNA1F
							HOXD11	DGKB			FGFR2						XBP1															SLC6A3		CACNB2
							HRAS	DGKH			FKBP5						XRCC1															SNCA		CACNG2
							HTR1B	DIO2			FOLH1																					SNCAIP		CADPS2
							HTR1D	DISC1			FTH1																					SOD1		CALB1
							HTR2A	DIXDC1			FTL																					SOD2		CALY
							HTR3A	DKK4			FTO																					SPG11		CAMK2B
							HTR3C	DLG2			GABPA																					SYNJ1		CAMKK2
							HTR5A	DLG3			GABRA3																					TAF1		CASP3
							IGF1	DLG4			GABRA6																					TALDO1		CASP4
							IGF2	DLX1			GABRB3																					TBP		CAV1
							IGFBP3	DNAJB1			GAD1																					THAP1		CBS
							IL15	DNMT1			GAL																					TNF		CCDC137
							IMMP2L	DOCK9			GAP43																					TOR1A		CCDC68
							INPP1	DOK5			GFAP																					UCHL1		CCDC86
							ITGA4	DPYSL2			GH1																					VPS13A		CCK
							ITGB3	DRD1			GHRL																					VPS35		CCL2
							JAKMIP1	DRD2			GLO1																					WDR45		CCNA2
							JMJD1C	DRD3			GLUL																							CCND1
							KCNMA1	DRD4			GNB1																							CCND2
							KDM5C	DRD5			GNB3																							CD163
							LAMB1	DSCAM			GPX1																							CDC42
							LASP1	DTNBP1			GRIA1																							CDC42SE2
							LZTR1	DUSP6			GRIA3																							CDK5
							MACROD2	EGR3			GRID1																							CDK5R1
							MAGEL2	EHHADH			GRIK3																							CDKN1C
							MAOA	ERBB3			GRIN2A																							CEACAM21
							MAOB	ERBB4			GRIN2B																							CGNL1
							MARK1	FABP7			GRM1																							CHAT
							MBD3	FADS2			GRM7																							CHD4
							MBD4	FBXL3			GRN																							CHEK1
							MCC	FGF17			GRPR																							CHGA
							MECP2	FGF20			GSK3A																							CHGB
							MEF2C	FGFR1			GSK3B																							CHI3L1
							MET	FGFR2			GSTM1																							CHL1
							MIF	FKBP5			GSTT1																							CHRM1
							MTF1	FYN			GYPE																							CHRM2
							MTHFR	FZD4			HCN1																							CHRM4
							MYO1D	G6PD			HCRT																							CHRM5
							NBEA	GABRA1			HCRTR1																							CHRNA3
							NF1	GABRA3			HDAC5																							CHRNA4
							NLGN1	GABRA5			HDAC6																							CHRNA5
							NLGN3	GABRB1			HDAC9																							CHRNA7
							NLGN4X	GABRB2			HOMER1																							CHRNB2
							NOS2	GABRB3			HP																							CKB
							NPAS2	GABRG1			HSD11B1																							CLDN5
							NRCAM	GAD1			HSPB3																							CLOCK
							NRP2	GAD2			HTR1A																							CLU
							NRXN1	GAL			HTR1B																							CMYA5
							NSD1	GAP43			HTR1D																							CNIH3
							NTF3	GDNF			HTR2A																							CNNM2
							NTF4	GFAP			HTR2C																							CNP
							NTRK2	GLO1			HTR3A																							CNR1
							OXT	GNAL			HTR3B																							CNR2
							OXTR	GNB1L			HTR4																							CNTNAP2
							PASK	GNB3			HTR7																							COMT
							PAX6	GPR78			HTT																							CP
							PCDH10	GRIA1			IDO1																							CPLX1
							PDE4A	GRIA2			IGF1																							CPLX2
							PDE4B	GRIA3			IL18																							CREB1
							PECAM1	GRID1			IL1B																							CRH
							PER1	GRIK1			IL6R																							CRMP1
							PLA2G4A	GRIK2			IMPA2																							CSF2RA
							PLAUR	GRIK4			KCNJ6																							CSF2RB
							PLD5	GRIK5			KCNK2																							CSMD1
							POMC	GRIN1			LGI1																							CSMD2
							POU6F2	GRIN2A			LIF																							CSNK1E
							PRF1	GRIN2B			LTA4H																							CSPG5
							PRKCB	GRIN3A			M6PR																							CTCF
							PRL	GRM3			MAOA																							CTNNA2
							PRLR	GRM4			MAOB																							CTNNB1
							PTCHD1	GRM5			MAP2K5																							CTNND2
							PTEN	GRM7			MAPK3																							CTRL
							PTGS2	GRN			MAPK8																							CTSK
							RAB11FIP5	GSK3A			MC1R																							CTXN3
							RAB39B	GSK3B			MCHR1																							CYFIP1
							REEP3	GSTM1			MED12																							CYP1A2
							RELN	GSTT1			MIF																							CYP2D6
							RIMS1	GSTZ1			MMAB																							CYP2E1
							RNF8	HCG9			MTHFR																							CYP3A4
							ROBO1	HIF1A			MTR																							DAAM2
							ROBO2	HINT1			NCAM1																							DAO
							ROBO3	HIP1R			NEFM																							DAZAP1
							ROBO4	HLA-DRB1			NGF																							DBN1
							RORA	HLA-DRB4			NGFR																							DCC
							RPL10	HLA-E			NOS1																							DCDC2
							SCAMP5	HLA-G			NOS2																							DCLK1
							SCT	HMGXB4			NOS3																							DDO
							SEMA5A	HPGDS			NPAS2																							DDR1
							SEZ6L2	HSP90B1			NPY																							DGCR2
							SHANK1	HSPA4			NPY1R																							DGCR6
							SHANK2	HSPA5			NR1D1																							DGCR8
							SHANK3	HTR1A			NR3C1																							DICER1
							SLC19A1	HTR1B			NR3C2																							DISC1
							SLC1A3	HTR2A			NRG1																							DIXDC1
							SLC25A12	HTR2C			NRXN1																							DKK3
							SLC40A1	HTR3A			NTRK2																							DKK4
							SLC6A8	HTR3B			NTS																							DLG1
							SLC9A9	HTR4			OAS2																							DLG2
							SND1	HTR5A			OPRK1																							DLG3
							SNTG2	IFNA1			OPRM1																							DLG4
							ST8SIA2	IGF1			OXT																							DLGAP1
							STK39	IGFBP2			OXTR																							DLGAP2
							STX1A	IL1B			P2RX7																							DLX1
							STXBP6	IL2RB			PCLO																							DNM1
							SYNGAP1	IMPA1			PDE1B																							DNMT1
							TAF1C	IMPA2			PDE4A																							DNMT3B
							TCN2	IMPACT			PDE4B																							DOCK4
							TDO2	INPP1			PDE4D																							DPYD
							TF	INS			PDYN																							DRD1
							TMLHE	ITGA9			PENK																							DRD2
							TPH2	ITGAM			PER2																							DRD3
							TSC1	ITIH3			PER3																							DRD4
							TSC2	ITIH4			PEX5L																							DTNBP1
							UBE2H	ITPR1			PITX3																							DYM
							UBE3A	KCNN3			PMCH																							EDEM2
							UPB1	KCNQ2			PNOC																							EFNB2
							VIP	KCNQ3			POMC																							EGR3
							VLDLR	KCTD12			PPP1R1B																							EGR4
							WNT2	KLK8			PPP3CC																							EIF2S1
							XPC	LARS2			PRKCI																							EIF5
							ZMYND11	LBX1			PRNP																							ELAVL2
								LDHA			PSEN1																							EML5
								LMAN2L			PTGS2																							EMX2
								MAGI1			PYY																							EN1
								MAGI2			RAC1																							EN2
								MAOA			RELN																							ENO2
								MAOB			RGS1																							ERBB3
								MAP2			RNF123																							ERBB4
								MAPK1			RORA																							ESAM
								MBD5			S100A10																							F2
								MCHR1			S100B																							FABP5
								MCHR2			SAT1																							FABP7
								MDGA1			SERPINA6																							FADS2
								ME2			SFRP1																							FAM3D
								MFGE8			SGCE																							FAS
								MLC1			SLC18A1																							FASTKD5
								MLLT3			SLC18A2																							FBP1
								MMP9			SLC1A1																							FBXL21
								MPPE1			SLC1A2																							FBXO45
								MTHFD1			SLC6A1																							FEZ1
								MTHFR			SLC6A3																							FGF2
								MTR			SLCO1C1																							FGFR1
								NAPG			SNAP25																							FGFR2
								NCAM1			SOD1																							FMR1
								NCAN			SOD2																							FOLH1
								NDST3			SRD5A1																							FOXP2
								NDUFV1			STAT3																							FSTL1
								NDUFV2			STIP1																							FUT8
								NDUFV3			STMN1																							FXYD1
								NEDD4			SYN1																							FXYD6
								NEFL			TAC1																							FYN
								NEFM			TBX19																							GABARAP
								NEK4			TGFB1																							GABBR1
								NFIX			TH																							GABRA1
								NLGN1			TIMELESS																							GABRA4
								NNMT			TLE1																							GABRA5
								NOD2			TNF																							GABRA6
								NOS3			TNFRSF1A																							GABRB1
								NOTCH4			TPH2																							GABRB2
								NPAS2			TRH																							GABRB3
								NPAS3			TTR																							GABRD
								NR1D1			UCN																							GABRG2
								NR2E1			VEGFA																							GAD1
								NR3C1			VGF																							GAD2
								NR4A2			WFS1																							GAP43
								NRG1			WWC1																							GCH1
								NRG3																										GCLC
								NRGN																										GDNF
								NRXN1																										GFAP
								NTNG1																										GFRA1
								NTNG2																										GFRA3
								NTRK1																										GJA8
								NTRK2																										GLO1
								OTX2																										GLUL
								P2RX7																										GNAL
								PALB2																										GNAO1
								PBRM1																										GNAS
								PCLO																										GNB1L
								PCNT																										GNB3
								PDE10A																										GNPAT
								PDE4A																										GPM6A
								PDE4B																										GPR153
								PDE9A																										GPR78
								PDLIM5																										GPS1
								PDYN																										GRB10
								PER2																										GRB2
								PER3																										GRIA1
								PFKFB3																										GRIA2
								PFKL																										GRIA3
								PGAM1																										GRIA4
								PGP																										GRID1
								PIK3C3																										GRIK1
								PIP4K2A																										GRIK2
								PIP4K2C																										GRIK3
								PLA2G4A																										GRIK4
								PLA2G6																										GRIK5
								PLCB1																										GRIN2A
								PLCG1																										GRIN2B
								PLCXD3																										GRIN2D
								PMCH																										GRIN3A
								POLG																										GRK6
								POMC																										GRM1
								POU3F2																										GRM2
								PPARD																										GRM3
								PPID																										GRM4
								PPP1R1B																										GRM5
								PPP2R2C																										GRM7
								PPP3CC																										GRM8
								PRKCI																										GRN
								PRKCZ																										GSK3A
								PRODH																										GSK3B
								PSEN2																										GSN
								PTGDS																										GSTM1
								PVALB																										GSTM2
								RAPGEF5																										GSTP1
								RASGRF1																										GSTT1
								RASGRP1																										GSTT2
								RELN																										H2AFX
								RFX4																										HAGH
								RGS4																										HCRTR1
								RNF41																										HDAC1
								ROR1																										HDAC2
								RORA																										HDAC3
								S100A10																										HDAC4
								S100B																										HDAC9
								S1PR1																										HHAT
								SAT1																										HINT1
								SCN8A																										HIST1H1E
								SEC24C																										HK1
								SERPINA1																										HLA-A
								SEZ6L																										HLA-B
								SFRP1																										HLA-C
								SIRT1																										HLA-DRB1
								SLC12A6																										HLA-E
								SLC17A6																										HLA-J
								SLC17A7																										HMGA1
								SLC18A1																										HMOX1
								SLC18A2																										HNRNPA3
								SLC1A1																										HOMER1
								SLC1A2																										HOMER2
								SLC1A3																										HP
								SLC1A6																										HPGDS
								SLC25A4																										HPS4
								SLC39A3																										HRH1
								SLC5A3																										HSPA12A
								SLC6A13																										HSPA1A
								SLC6A3																										HSPA1L
								SMS																										HSPA9
								SNAP25																										HTR1A
								SOD2																										HTR1F
								SORCS2																										HTR2A
								SP4																										HTR2C
								SP8																										HTR3A
								SPR																										HTR3B
								SST																										HTR3D
								SSTR5																										HTR4
								ST3GAL1																										HTR5A
								ST8SIA2																										HTR6
								STAB1																										HTR7
								SYN3																										ICAM1
								SYNE1																										IDE
								SYNGR1																										IGF2
								TAC1																										IGF2BP2
								TCF4																										IL17C
								TCF7L2																										IL18
								TDO2																										IL18R1
								TGFB1																										IL1B
								TGM2																										IL3RA
								TH																										IL6R
								TIMELESS																										IMPA2
								TLL2																										INPP5A
								TLR2																										IPO5
								TLR4																										ITGA8
								TMSB10																										ITGAM
								TNF																										ITGB3
								TOM1																										ITIH3
								TPH2																										JAG1
								TRPC3																										JAG2
								TRPM2																										JARID2
								TSHB																										JUN
								TSNAX																										KCNB1
								TSPAN8																										KCNH2
								TSPO																										KCNH6
								TUBA8																										KCNJ3
								UCP2																										KCNN3
								ULK4																										KCNQ2
								USP46																										KCNQ3
								VAPA																										KCNS3
								VDR																										KCTD12
								VEGFA																										KDM2B
								VGF																										KDR
								VIP																										KIF17
								VIPR2																										KIF2A
								WFS1																										KLF12
								XBP1																										KLF5
								YWHAE																										KMO
								YWHAH																										KPNA1
								YWHAZ																										KPNA3
								ZNF804A																										KREMEN1
																																		LAMA1
																																		LAMA2
																																		LARS2
																																		LASP1
																																		LHX6
																																		LIFR
																																		LMAN2L
																																		LMOD2
																																		LPAR1
																																		LPL
																																		LRP1
																																		LRP2
																																		LRP8
																																		LRRTM1
																																		LSAMP
																																		LTA
																																		LYRM4
																																		MAD1L1
																																		MAG
																																		MAGEC1
																																		MAGI1
																																		MAGI2
																																		MAOA
																																		MAOB
																																		MAP2K7
																																		MAP6
																																		MAPK1
																																		MAPK14
																																		MAPK3
																																		MAPK8
																																		MARK2
																																		MBD2
																																		MBNL1
																																		MBP
																																		MCAT
																																		MCHR1
																																		MCHR2
																																		MDGA1
																																		MDH1
																																		MDK
																																		ME2
																																		MED12
																																		MED15
																																		MEGF10
																																		MET
																																		MICB
																																		MLC1
																																		MMP9
																																		MOG
																																		MPZL1
																																		MSRA
																																		MTHFD1
																																		MTHFR
																																		MTNR1A
																																		MTOR
																																		MTR
																																		MYO16
																																		MYO5B
																																		MYO9B
																																		MYT1L
																																		NAV1
																																		NCAM1
																																		NCAN
																																		NDE1
																																		NDEL1
																																		NDP
																																		NDST3
																																		NDUFS1
																																		NDUFV1
																																		NDUFV2
																																		NEFL
																																		NEUROG1
																																		NFASC
																																		NGFR
																																		NKAPL
																																		NLGN1
																																		NLGN2
																																		NNMT
																																		NOS1
																																		NOS1AP
																																		NOTCH4
																																		NPAS1
																																		NPAS2
																																		NPAS3
																																		NPTN
																																		NPY
																																		NPY1R
																																		NQO2
																																		NR2E1
																																		NR3C1
																																		NR4A2
																																		NRG1
																																		NRG3
																																		NRGN
																																		NRIP1
																																		NRN1
																																		NRXN1
																																		NRXN2
																																		NRXN3
																																		NTF3
																																		NTNG1
																																		NTNG2
																																		NTRK1
																																		NTRK2
																																		NTRK3
																																		NTS
																																		NUFIP2
																																		NUMBL
																																		OLIG2
																																		OPA1
																																		OPCML
																																		OPRM1
																																		OXSR1
																																		OXT
																																		OXTR
																																		PAFAH1B1
																																		PAG1
																																		PAH
																																		PAK2
																																		PANK2
																																		PAWR
																																		PAX6
																																		PBRM1
																																		PCDH17
																																		PCDH8
																																		PCK1
																																		PCM1
																																		PCNT
																																		PDE4A
																																		PDE4B
																																		PDE4D
																																		PDE7B
																																		PDGFRB
																																		PDIK1L
																																		PDLIM5
																																		PDYN
																																		PDZK1
																																		PEMT
																																		PGBD1
																																		PHB
																																		PI4K2B
																																		PI4KA
																																		PICK1
																																		PIK3C3
																																		PIK3CA
																																		PIK3CB
																																		PINK1
																																		PIP4K2A
																																		PIP4K2C
																																		PITPNM1
																																		PITX3
																																		PKNOX2
																																		PLA2G4A
																																		PLA2G4B
																																		PLA2G4C
																																		PLA2G6
																																		PLAA
																																		PLAT
																																		PLCB1
																																		PLCL2
																																		PLEKHA6
																																		PLLP
																																		PLP1
																																		PLSCR4
																																		PLXNA2
																																		PML
																																		PMP2
																																		PNPO
																																		PPARA
																																		PPARGC1A
																																		PPIA
																																		PPP1R1B
																																		PPP1R9B
																																		PPP3CC
																																		PPP3R1
																																		PRDX6
																																		PRKCA
																																		PRL
																																		PRODH
																																		PRSS16
																																		PSAT1
																																		PSD
																																		PSD3
																																		PSEN2
																																		PTGER3
																																		PTGS1
																																		PTGS2
																																		PTPN1
																																		PTPN21
																																		PTPN5
																																		PTPN6
																																		PTPRA
																																		PTPRZ1
																																		PVALB
																																		QKI
																																		R3HDML
																																		RAI1
																																		RANBP9
																																		RAPGEF6
																																		RARA
																																		RASD2
																																		RB1CC1
																																		RBP1
																																		RCBTB1
																																		RELA
																																		RELN
																																		REST
																																		RGS12
																																		RGS2
																																		RGS5
																																		RGS9
																																		RIMS2
																																		RIMS3
																																		RTKN2
																																		RTN4
																																		RTN4R
																																		S100B
																																		SAP30BP
																																		SBNO1
																																		SBNO2
																																		SDCCAG8
																																		SDF4
																																		SDHA
																																		SELENBP1
																																		SEMA3A
																																		SEMA3D
																																		SERPINI1
																																		SETD1A
																																		SETDB1
																																		SH3PXD2A
																																		SHANK1
																																		SHANK3
																																		SHMT1
																																		SIGMAR1
																																		SIRPB1
																																		SIRT1
																																		SLC12A2
																																		SLC12A5
																																		SLC17A6
																																		SLC17A7
																																		SLC18A1
																																		SLC18A2
																																		SLC1A1
																																		SLC1A2
																																		SLC1A3
																																		SLC1A6
																																		SLC25A27
																																		SLC26A8
																																		SLC30A3
																																		SLC38A2
																																		SLC6A1
																																		SLC6A11
																																		SLC6A12
																																		SLC6A3
																																		SLC6A5
																																		SLC6A9
																																		SLC7A10
																																		SLIT3
																																		SMAD5
																																		SMARCA2
																																		SNAP29
																																		SNCB
																																		SNX31
																																		SOCS2
																																		SOD2
																																		SOX10
																																		SOX5
																																		SP1
																																		SP4
																																		SPATA5
																																		SPTBN2
																																		SREBF1
																																		SREBF2
																																		SRGAP3
																																		SRR
																																		SST
																																		ST3GAL1
																																		ST6GALNAC1
																																		ST8SIA2
																																		STH
																																		STON2
																																		STX1A
																																		STXBP1
																																		SULT4A1
																																		SV2A
																																		SYN1
																																		SYN2
																																		SYN3
																																		SYNGAP1
																																		SYNGR1
																																		SYP
																																		SYT11
																																		TAC1
																																		TACR3
																																		TAP1
																																		TAP2
																																		TAPBP
																																		TBP
																																		TCF4
																																		TCF7L2
																																		TDO2
																																		TEKT5
																																		TET1
																																		TF
																																		TGFB1
																																		TGM2
																																		THBS1
																																		TLR2
																																		TLR3
																																		TLR4
																																		TMSB10
																																		TNF
																																		TNFRSF1A
																																		TNFSF13
																																		TNIK
																																		TNXB
																																		TOP3B
																																		TPH2
																																		TPT1
																																		TRAK1
																																		TRMT2A
																																		TRRAP
																																		TSNARE1
																																		TSPAN18
																																		TSPAN8
																																		TXNDC5
																																		UCP2
																																		UHMK1
																																		ULK4
																																		UNC5C
																																		VIP
																																		VIPR2
																																		VLDLR
																																		VPS35
																																		VPS39
																																		VRK2
																																		VSNL1
																																		XBP1
																																		XRCC1
																																		XRCC4
																																		YWHAE
																																		ZDHHC8
																																		ZIC2
																																		ZKSCAN4
																																		ZNF480
																																		ZNF530
																																		ZNF565
																																		ZNF74
																																		ZNF804A

## Sheet: Disease specificity
Class	GBD class	Disease	FDR B&H	NegLog10	# Genes	FDR B&H	NegLog10	Unique Genes	% Uniq	U-ratio
Psychiatric	1	Bipolar disorder	1.008e-192	191.997	384	6.263e-179	178.203	110	0.286458	3.24012
Psychiatric	1	Depressive disorder	5.091e-194	193.293	251	8.611e-84	83.0649	47	0.187251	2.29497
Psychiatric	1	Schizophrenia	1e-254	254	733	1e-254	254	354	0.482947	2.07062
Psychiatric	1	Autistic disorders	1e-254	254	206	3.344e-172	171.476	93	0.451456	1.49539
Neurodegenerative	4	Dementia	2.806e-23	22.5519	15	0.006055	2.21789	1	0.0666667	1.47519
Substance abuse	2	Tobacco use	2.56e-28	27.5918	13	1.008e-13	12.9965	5	0.384615	1.22468
Developemental	6	Spastic paraplegia	2.57e-71	70.5901	66	6.46e-66	65.1898	59	0.893939	1.03307
Developemental	6	Williams syndrome	8.352e-31	30.0782	18	2.038e-28	27.6908	17	0.944444	0.974781
Neurodegenerative	4	Multiple sclerosis	1.998e-93	92.6994	34	2.351e-57	56.6287	22	0.647059	0.944096
BrainTumors	5	Gliobastoma	5.023e-142	141.299	57	6.711e-53	52.1732	23	0.403509	0.915072
Substance abuse	2	Amphetamine abuse	2.716e-178	177.566	68	1.483e-59	58.8289	25	0.367647	0.901155
Brain Related	7	Narcolepsy	6.821e-44	43.1662	14	7.164e-20	19.1448	7	0.5	0.88703
Brain Related	7	Hyperalgesia	1.003e-174	173.999	69	5.052e-36	35.2965	16	0.231884	0.874813
Neurodegenerative	4	Amyotrophic lateral sclerosis	2.097e-135	134.678	50	6.307e-71	70.2002	30	0.6	0.868738
Substance abuse	2	Cocaine abuse	9.988e-201	200.001	85	2.078e-37	36.6824	18	0.211765	0.866109
Movement	3	Dystonia	3.085e-46	45.5107	19	9.059e-05	4.04292	2	0.105263	0.843927
Brain related	7	Amnesia	5.693e-40	39.2447	13	8.552e-11	10.0679	4	0.307692	0.833764
BrainTumors	5	Gliosarcoma	2.938e-43	42.5319	14	6.635e-16	15.1782	6	0.428571	0.832685
Neurodegenerative	4	Huntingtons disease	1.112e-42	41.9539	13	3.699e-19	18.4319	7	0.538462	0.815912
BrainTumors	5	Glioma	6.448e-189	188.191	87	8.158e-73	72.0884	42	0.482759	0.793483
Developemental	6	Intellectual disability, X-linked	1.614e-60	59.7921	21	1.313e-29	28.8817	13	0.619048	0.780289
BrainTumors	5	Astrocytoma	1.861e-69	68.7303	25	1.564e-15	14.8058	7	0.28	0.769352
Developmental	6	Language development	4.333e-37	36.3632	11	3.365e-08	7.47301	3	0.272727	0.753538
Movement	3	Epilepsy	6.748e-158	157.171	57	1.864e-29	28.7296	14	0.245614	0.744224
Substance abuse	2	Alcoholic intoxication	1.094e-65	64.961	30	3.06e-10	9.51428	6	0.2	0.732307
Substance abuse	2	Substance withdrawl syndrome	8.001e-129	128.097	46	6.389e-11	10.1946	5	0.108696	0.73218
Movement	3	Ataxia	7.216e-40	39.1417	22	1.168e-14	13.9326	12	0.545455	0.652578
Neurodegenerative	4	Alzheimer's disease	1.588e-192	191.799	75	4.572e-38	37.3399	23	0.306667	0.634833
Brain Related	7	Migraine disorders	3.681e-20	19.434	34	2.548e-07	6.5938	20	0.588235	0.576795
Neurodegenerative	4	Frototemporal lobar dementia	1.155e-17	16.9374	11	0.01699	1.76981	2	0.181818	0.5747
Psychiatric	1	Obsessive compulsive disorder	1.115e-08	7.95273	11	0.06773	1.16922	3	0.272727	0.539078
Psychiatric	1	Seasonal affective disorder	1.031e-40	39.9867	17	0.05805	1.2362	1	0.0588235	0.525558
Movement	3	Epilepsy, temporal lobe	2.362e-61	60.6267	30	8.961e-06	5.04764	5	0.166667	0.499546
Movement	3	Parkinsonion disorders	3.743e-82	81.4268	26	0.001143	2.94195	2	0.0769231	0.469691
Brain Related	7	Neuralgia	4.518e-41	40.3451	19	6.903e-06	5.16096	6	0.315789	0.405082
Neurodegenerative	4	Parkinson disease	6.357e-254	253.197	102	7.221e-22	21.1414	31	0.303922	0.274735
Substance abuse	2	Heroin use	1.663e-18	17.7791	14	0.04417	1.35487	5	0.357143	0.213376
Developmental	6	Learning disorders	1.833e-74	73.7368	24	0.1115	0.952725	2	0.0833333	0.155047
BrainTumors	5	Neurofibromatosis1	1.878e-70	69.7263	24	0.02521	1.59843	18	0.75	0.0305657
Substance abuse	2	Marijuana abuse	7.882e-77	76.1034	27	0	0	0	0	0
